# Supplementary material for: HPLC- and NMR-Based Chemical Profiling, Wound-Healing Potential, Anti-Inflammatory and Antibacterial Activities of Satureja pilosa (Lamiaceae), a Neglected Medicinal–Aromatic Herb
Source: MDPI journal article supplement (doi:10.3390/plants12244114), 2023-12-08
Supplement: s1 [file s1]

**HPLC- and NMR-based chemical profiling, wound healing potential, anti-inflammatory and antibacterial activities of *Satureja pilosa* (Lamiaceae), a neglected medicinal-aromatic herb**

Christina Panagiotidou, Luisa D. Burgers, Chara Almpani, Christina Tsadila, Nikos Krigas, Dimitris Mossialos, Michail Christou Rallis, Robert Fürst<sup>f</sup>, Anastasia Karioti<sup>\*</sup>

**Supplementary materials**

|                                                                                                                                                                                                                     |           |
|---------------------------------------------------------------------------------------------------------------------------------------------------------------------------------------------------------------------|-----------|
| <b>Figure S1.</b> Scheme of the whole extraction protocol, analysis and biological assays                                                                                                                           | <b>2</b>  |
| <b>Figure S2.</b> Scheme of the isolation process                                                                                                                                                                   | <b>3</b>  |
| <b>Figure S3.</b> Representative HPLC-PDA-MS chromatogram of the Butanol extract (Organic phase C) of <i>Satureja pilosa</i> .                                                                                      | <b>4</b>  |
| <b>Figure S4.</b> Representative HPLC-PDA-MS chromatogram of the aqueous phase of <i>Satureja pilosa</i>                                                                                                            | <b>5</b>  |
| <b>Figure S5.</b> <sup>1</sup> H-NMR spectrum (CD <sub>3</sub> OD, 500 MHz) of 3,4-dihydroxyphenylactic acid                                                                                                        | <b>6</b>  |
| <b>Figure S6.</b> <sup>1</sup> H-NMR spectrum (CD <sub>3</sub> OD, 500 MHz) of rosmarinic acid                                                                                                                      | <b>6</b>  |
| <b>Figure S7.</b> <sup>1</sup> H-NMR spectrum (CD <sub>3</sub> OD, 500 MHz) of melitric acid A                                                                                                                      | <b>7</b>  |
| <b>Figure S8.</b> <sup>1</sup> H-NMR spectrum (CD <sub>3</sub> OD, 500 MHz) of melitric acid A methylester                                                                                                          | <b>8</b>  |
| <b>Figure S9.</b> <sup>1</sup> H-NMR spectrum (CD <sub>3</sub> OD, 500 MHz) of clinopodic acid I                                                                                                                    | <b>9</b>  |
| <b>Figure S10.</b> <sup>1</sup> H-NMR spectrum (CD <sub>3</sub> OD, 500 MHz) of clinopodic acid O                                                                                                                   | <b>10</b> |
| <b>Figure S11.</b> The effects of different extracts of <i>S. pilosa</i> , rosmarinic acid, 3,4-dihydroxyphenylactic acid and the mixture of clinopodic acid I/melitric acid A on cell viability of 3T3 fibroblasts | <b>11</b> |
| <b>Table S1.</b> Antibacterial activity of representative compounds from <i>Satureja pilosa</i> <i>Staphylococcus aureus</i> and <i>Pseudomonas aeruginosa</i> expressed as MIC value                               | <b>11</b> |

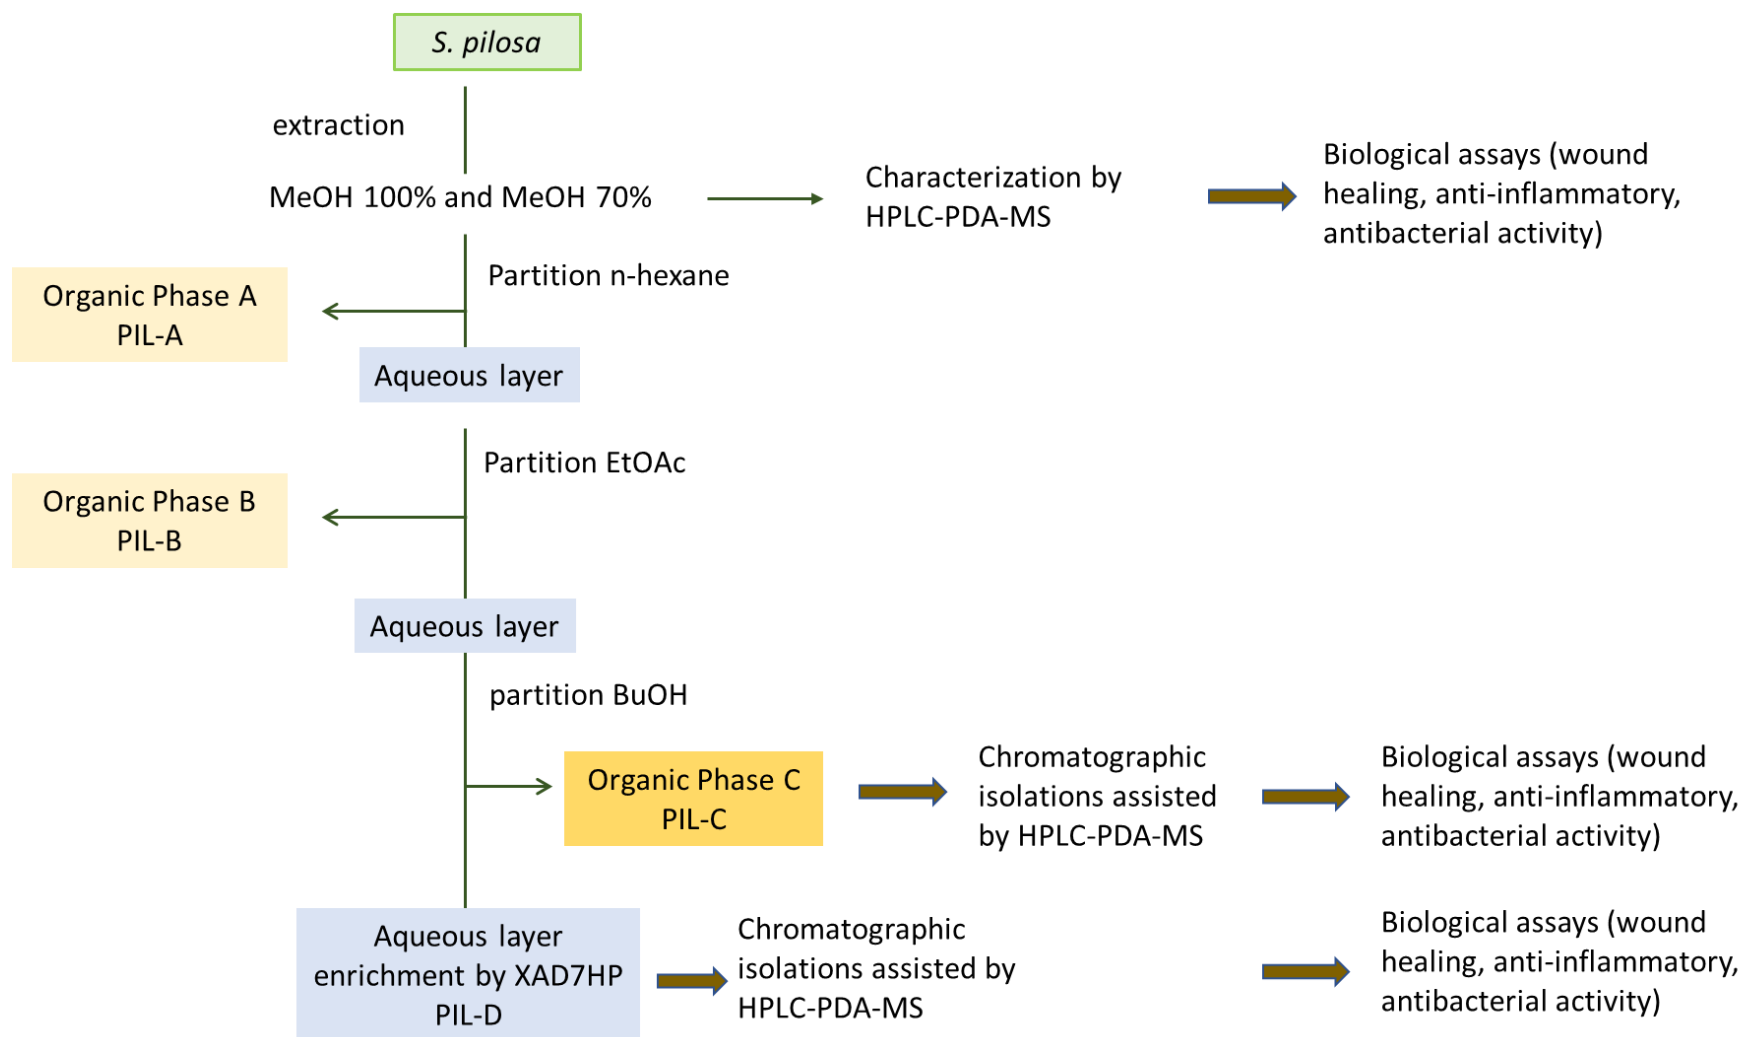

**Figure S1.** Scheme of the whole extraction protocol, analysis and biological assays for cultivated *Satureja pilosa*.

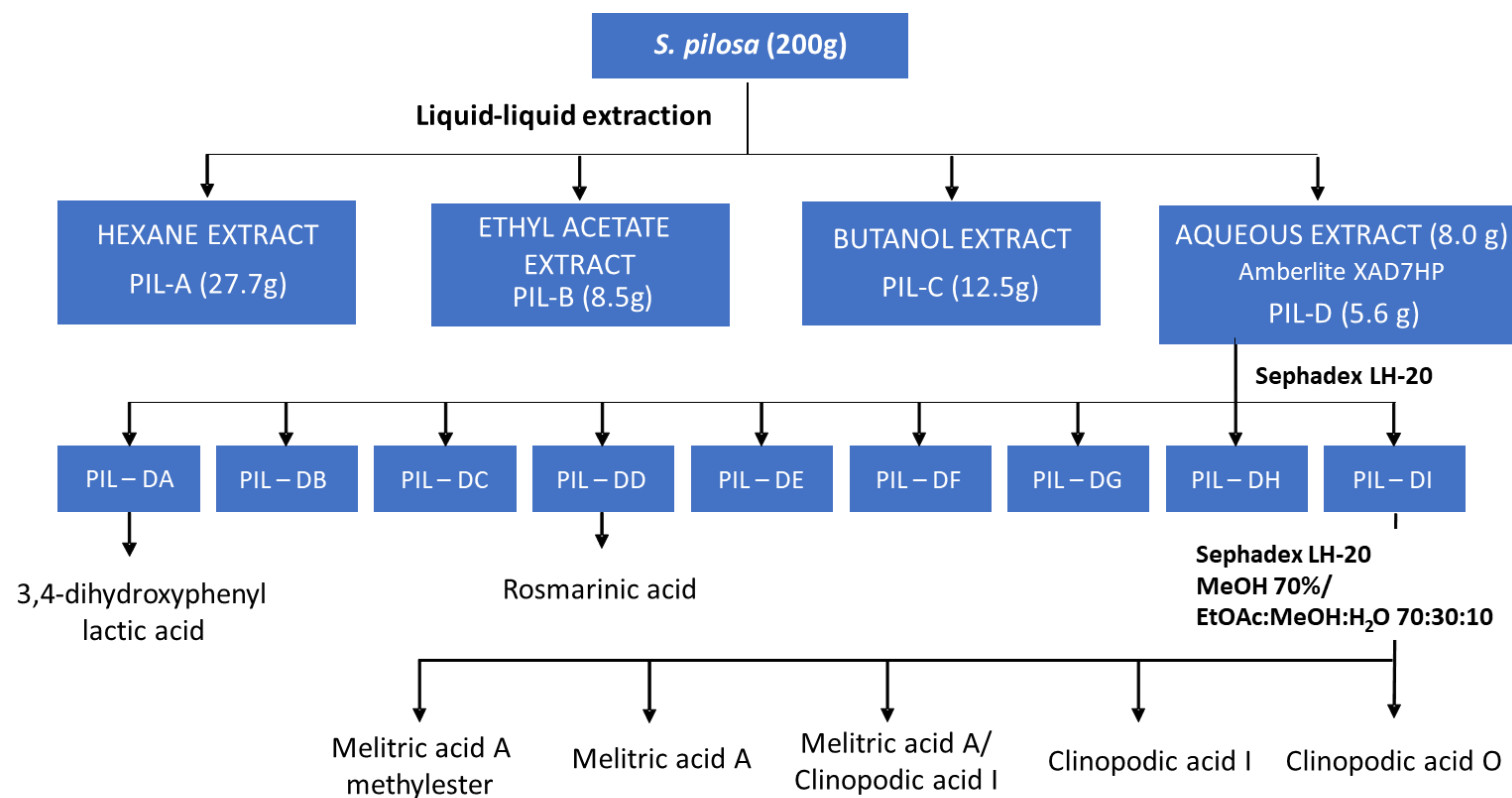

**Figure S2.** Scheme of the isolation process.

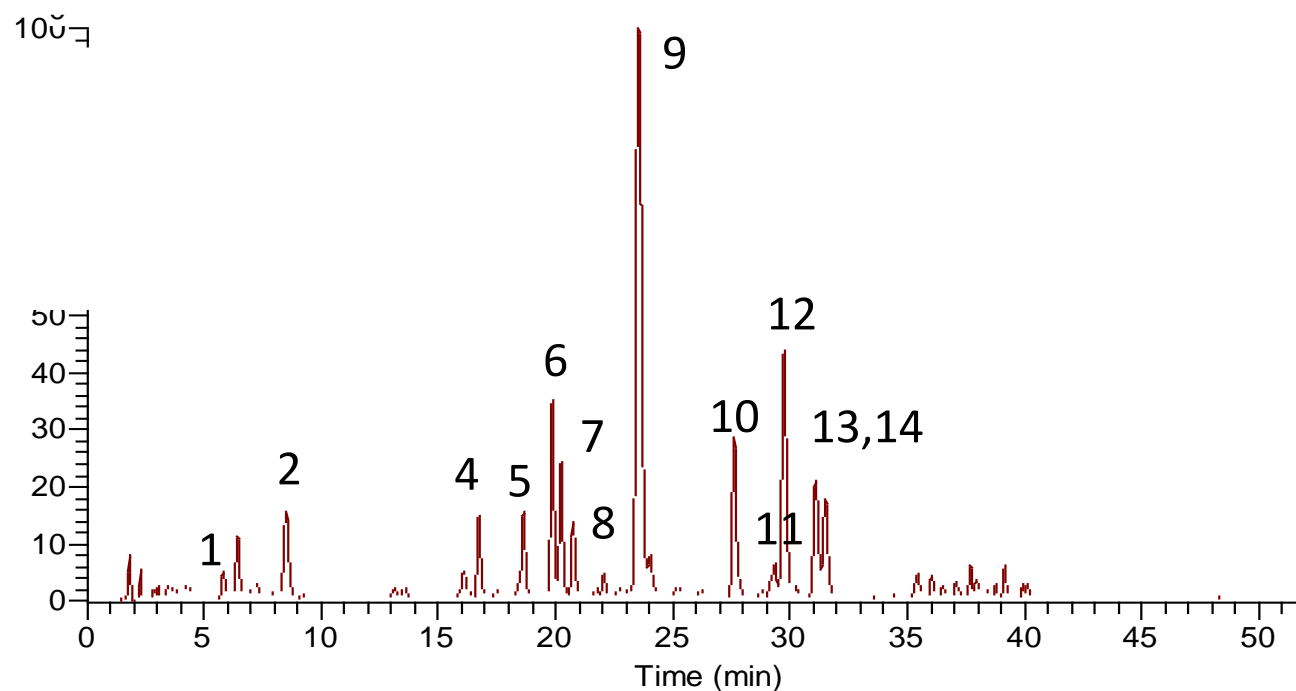

**Figure S3.** Representative HPLC-PDA-MS chromatogram of the Butanol extract (Organic phase C) of *Satureja pilosa*. Experimental conditions: column: Zorbax SBAq RP-C18 (150 x 3.0 mm), particle size of 3.5 $\mu$ m (Agilent) at 30 °C. Compounds detected: 12-hydroxyjasmonic acid glucoside (**1**); vicenin 2 (**2**); luteolin-7-*O*-diglucuronide (**4**); luteolin-7-*O*-rutinoside (**5**); luteolin-7-*O*-glucoside (**6**); luteolin-7-*O*-glucuronide (**7**); hesperidin (hesperitin-7-*O*-rutinoside) (**8**); rosmarinic acid (**9**); luteolin-3'-*O*-glucuronide (**10**); depside tetramer – not identified (**11**); melitric acid A (**12**); clinopodic acid I (**13**); acacetin-7-*O*-rhamnosyl-glucoside (**14**).

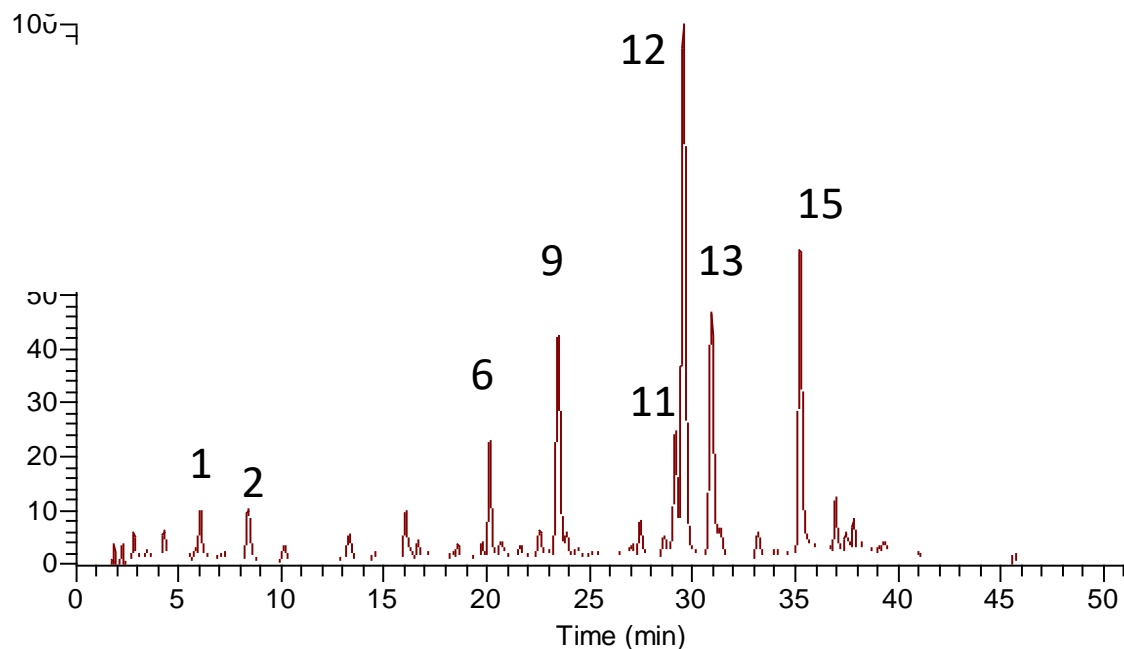

**Figure S4.** Representative HPLC-PDA-MS chromatogram of the aqueous phase of *Satureja pilosa*. Experimental conditions: column: Zorbax SBAq RP-C18 (150 x 3.0 mm), particle size of 3.5 $\mu$ m (Agilent) at 30 °C. Compounds detected: 12-hydroxyjasmonic acid glucoside (**1**); vicenin 2 (**2**); luteolin-7-*O*-glucoside (**6**); rosmarinic acid (**9**); depside tetramer – not identified (**11**); melitric acid A (**12**); clinopodic acid I (**13**); clinopodic acid O (**15**).

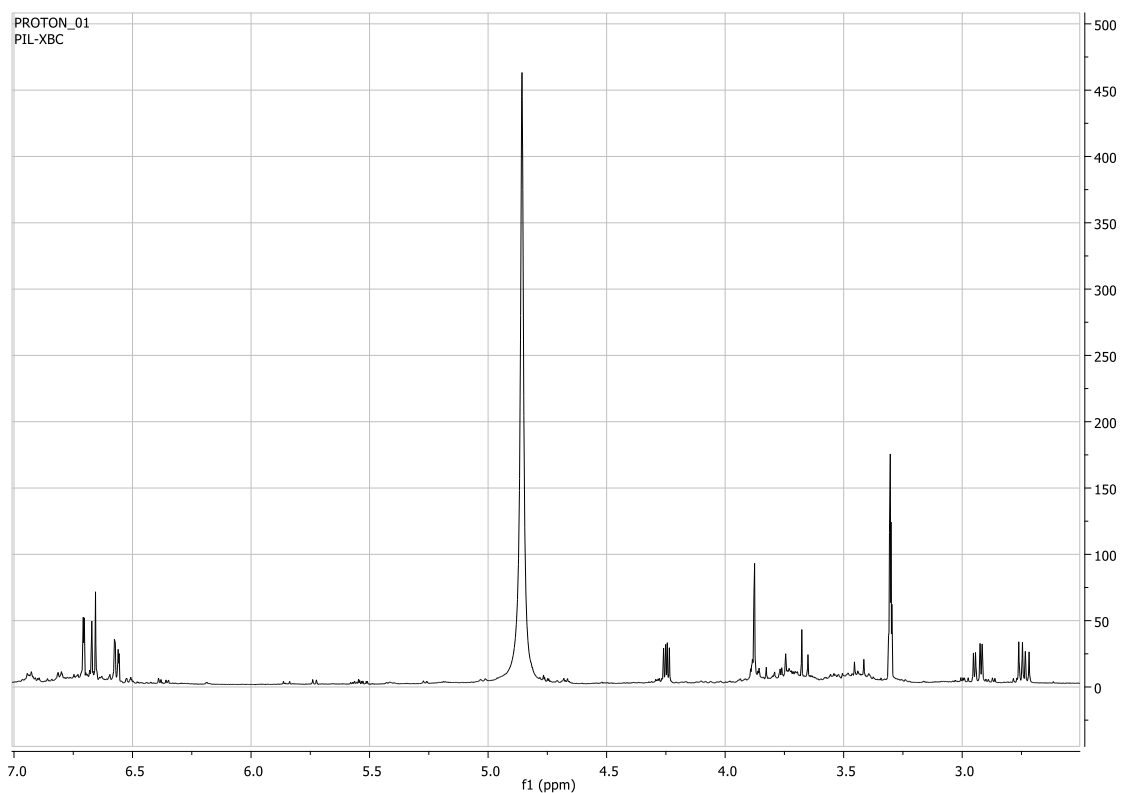

**Figure S5.**  $^1\text{H}$ -NMR spectrum ( $\text{CD}_3\text{OD}$ , 500 MHz) of 3,4-dihydroxyphenyllactic acid.

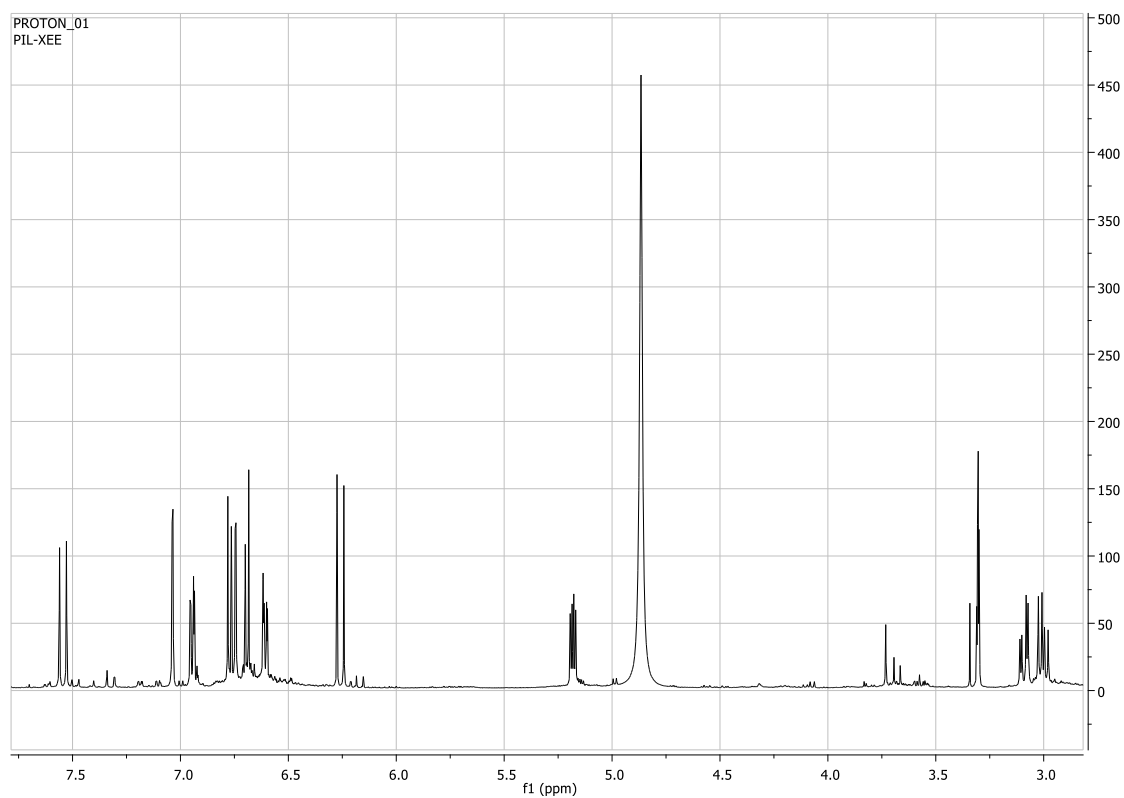

**Figure S6.**  $^1\text{H}$ -NMR spectrum ( $\text{CD}_3\text{OD}$ , 500 MHz) of rosmarinic acid.

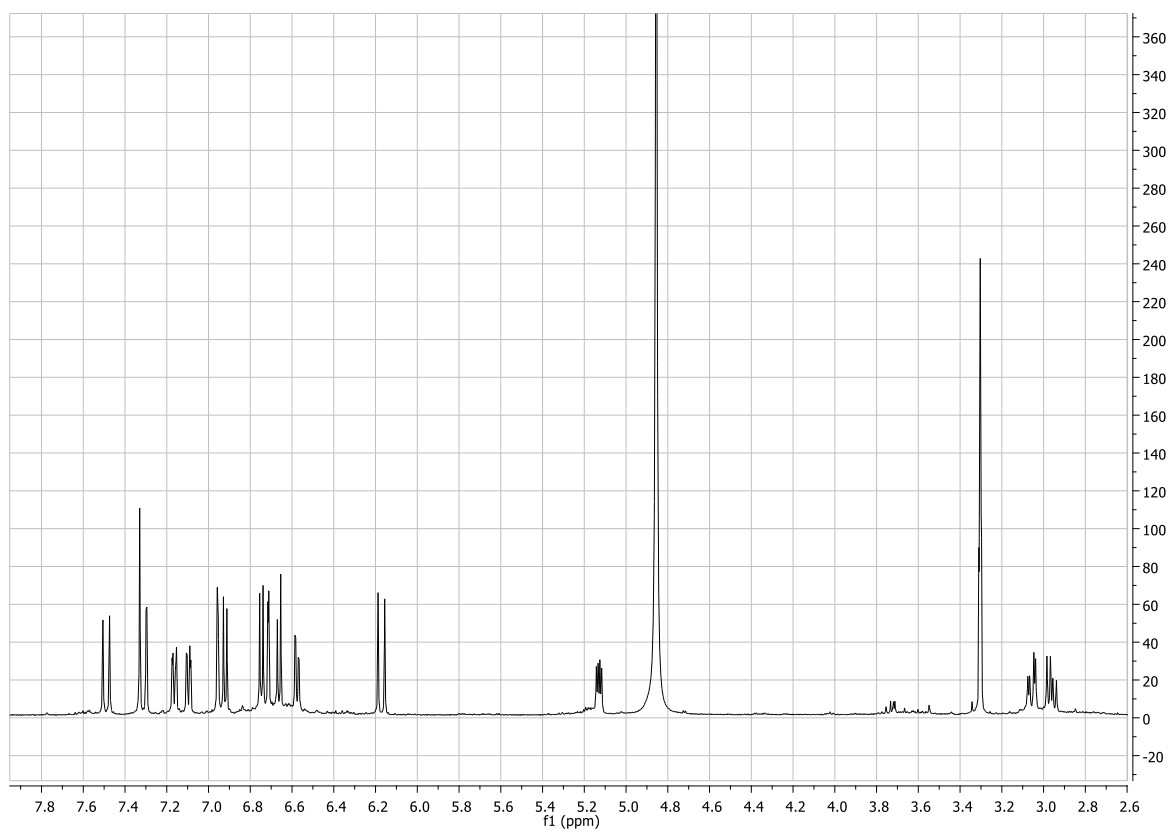

**Figure S7.**  $^1\text{H}$ -NMR spectrum ( $\text{CD}_3\text{OD}$ , 500 MHz) of melitric acid A.

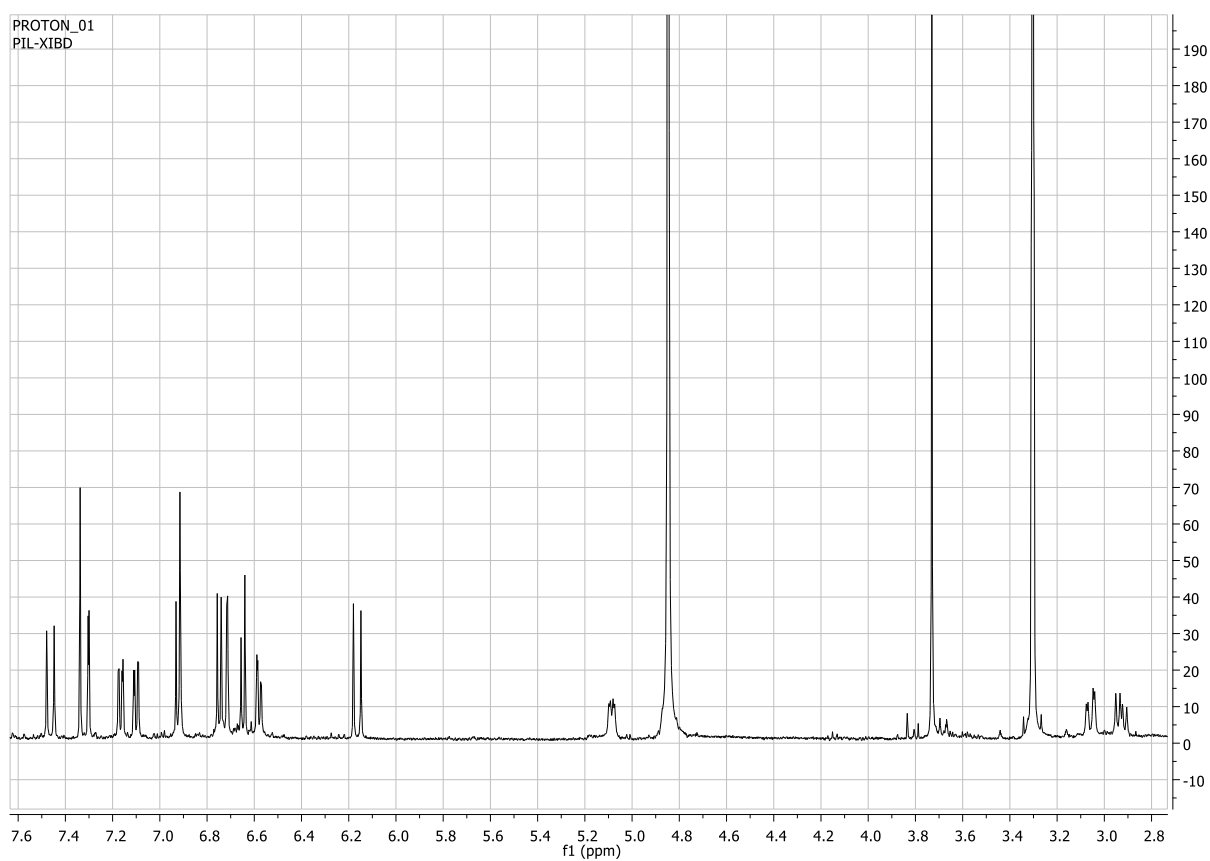

**Figure S8.**  $^1\text{H}$ -NMR spectrum ( $\text{CD}_3\text{OD}$ , 500 MHz) of melitric acid A methylester.



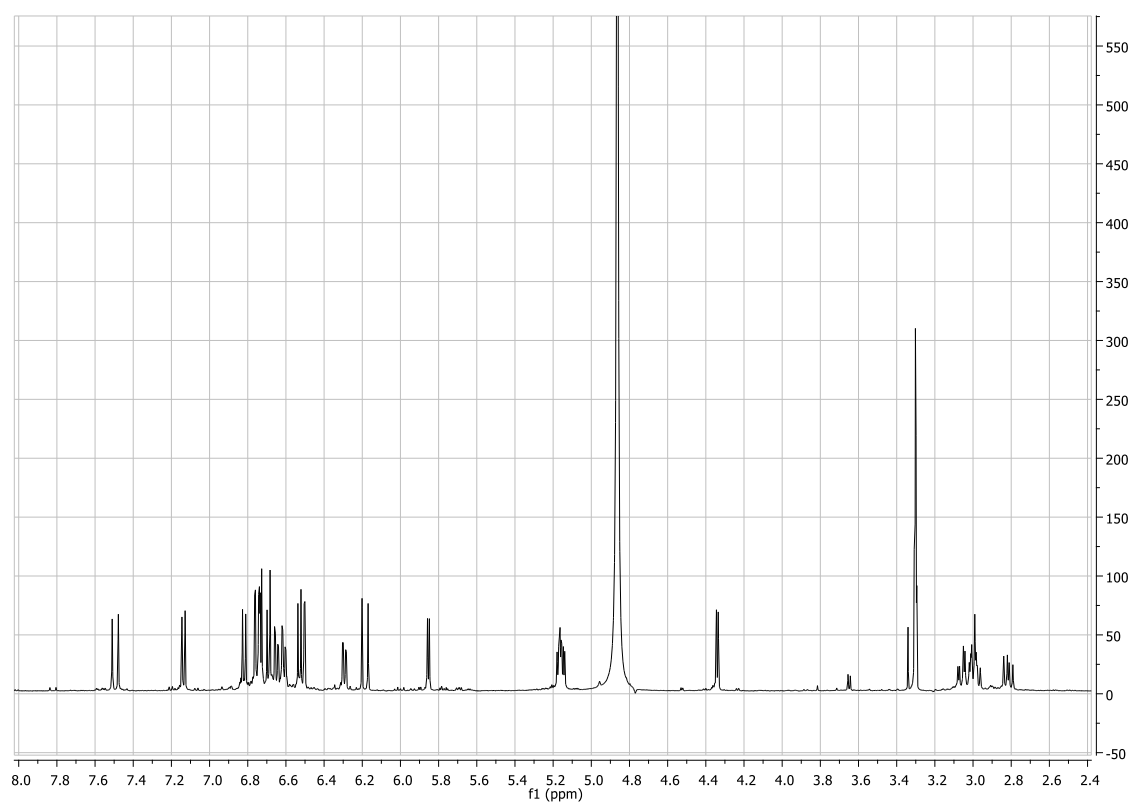

**Figure S9.**  $^1\text{H}$ -NMR spectrum ( $\text{CD}_3\text{OD}$ , 500 MHz) of Clinopodic acid I.

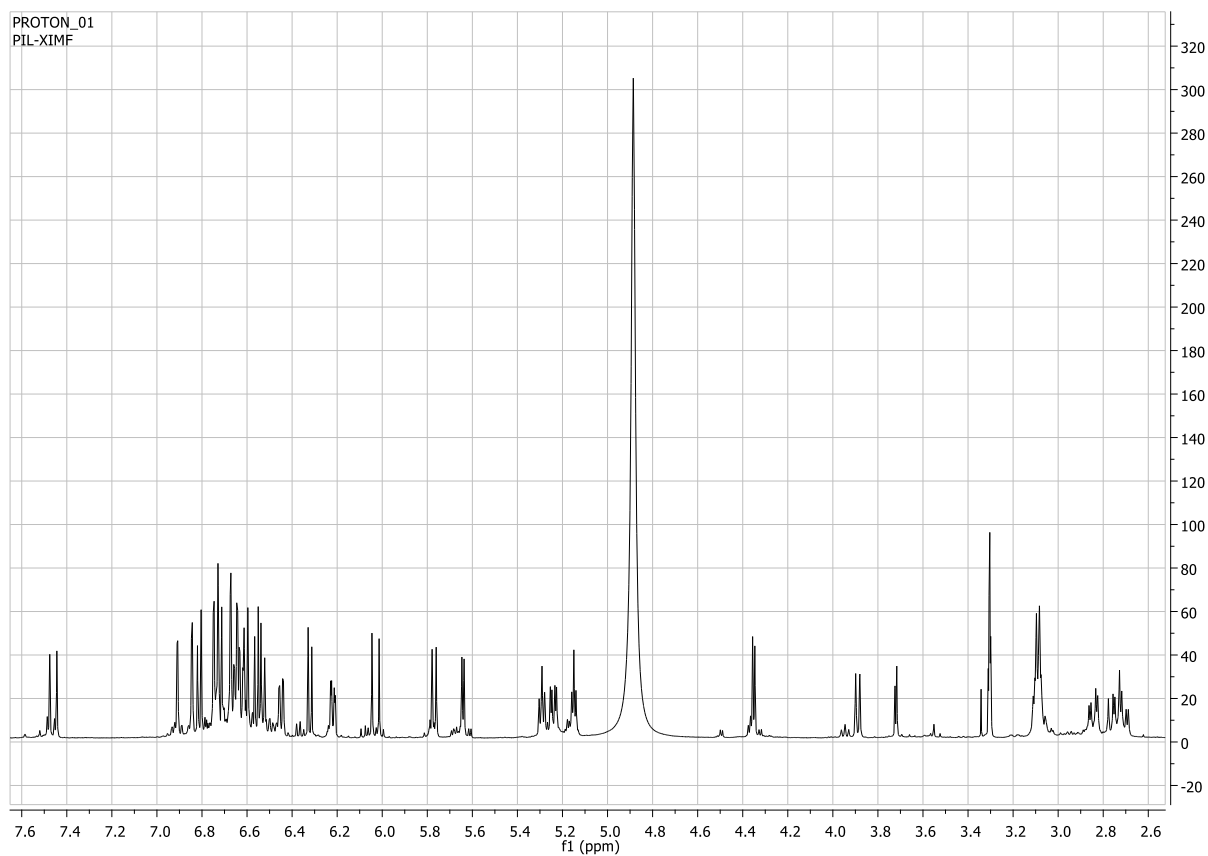

**Figure S10.**  $^1\text{H}$ -NMR spectrum ( $\text{CD}_3\text{OD}$ , 500 MHz) of Clinopodic acid O.

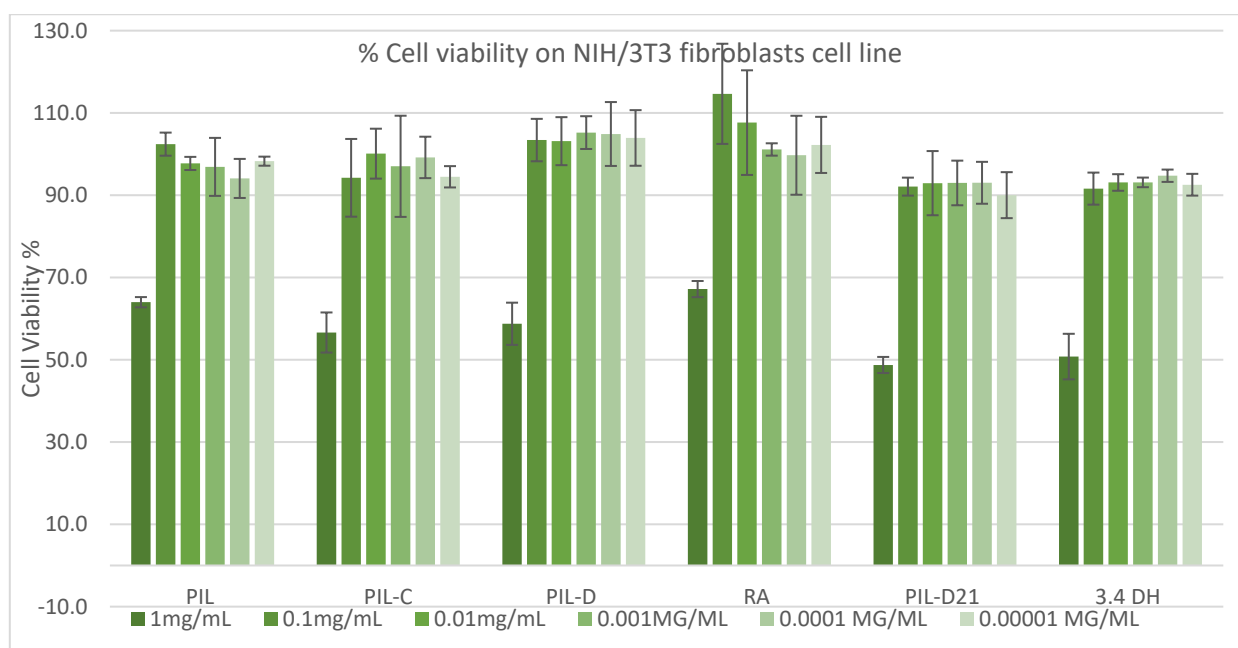

**Figure S11.** The effects of different extracts of *S. pilosa*, rosmarinic acid, 3,4-dihydroxyphenyllactic acid and the mixture of clinopodic acid I/melitric acid A on cell viability of 3T3 fibroblasts.

**Table S1.** Antibacterial activity of representative compounds from *Satureja pilosa* *Staphylococcus aureus* and *Pseudomonas aeruginosa* expressed as MIC value.

|               |                                                                | <i>S. aureus</i> | <i>P. aeruginosa</i> |
|---------------|----------------------------------------------------------------|------------------|----------------------|
| Sample        |                                                                | MIC (μg/mL)      |                      |
| 3             | 3,4-dihydroxyphenyllactic acid                                 | >300             | >300                 |
| 9             | rosmarinic acid                                                | >300             | >300                 |
| 15            | clinopodic acid O                                              | >300             | >300                 |
| 13            | clinopodic acid I                                              | >300             | >300                 |
| 12-13         | PILD-21 (mixture 1:1 of clinopodic acid I and melitric acid A) | >300             | >300                 |
| PIL           | <i>S. pilosa</i> initial (methanol)                            | >300             | >300                 |
| PIL-C         | <i>S. pilosa</i> ( <i>n</i> -BuOH extract)                     | >300             | >300                 |
| PIL-D         | <i>S. pilosa</i> (aqueous extract)                             | >300             | >300                 |
| vancomycin    |                                                                | 4                | -                    |
| ciprofloxacin |                                                                | -                | 2                    |

Standard: vancomycin (Sigma-Aldrich, Germany) for *S. aureus* and ciprofloxacin (Sigma-Aldrich, Germany) for *P. aeruginosa*.
